# Supplementary material for: Free and partially encapsulated manganese ferrite nanoparticles in multiwall carbon nanotubes
Source: publisher site journal article supplement (doi:10.3762/bjnano.11.170), 2020-12-29
Supplement: Additional file 1 [file 2190-4286-11-170-S1.pdf]

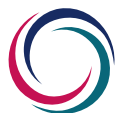

## Supporting Information

for

### **Free and partially encapsulated manganese ferrite nanoparticles in multiwall carbon nanotubes**

Saja Al-Khabouri, Salim Al-Harhi, Toru Maekawa, Mohamed E. Elzain, Ashraf Al-Hinai, Ahmed D. Al-Rawas, Abbsher M. Gismelseed, Ali A. Yousif and Myo Tay Zar Myint

*Beilstein J. Nanotechnol.* **2020**, *11*, 1891–1904. doi:10.3762/bjnano.11.170

## Additional figures

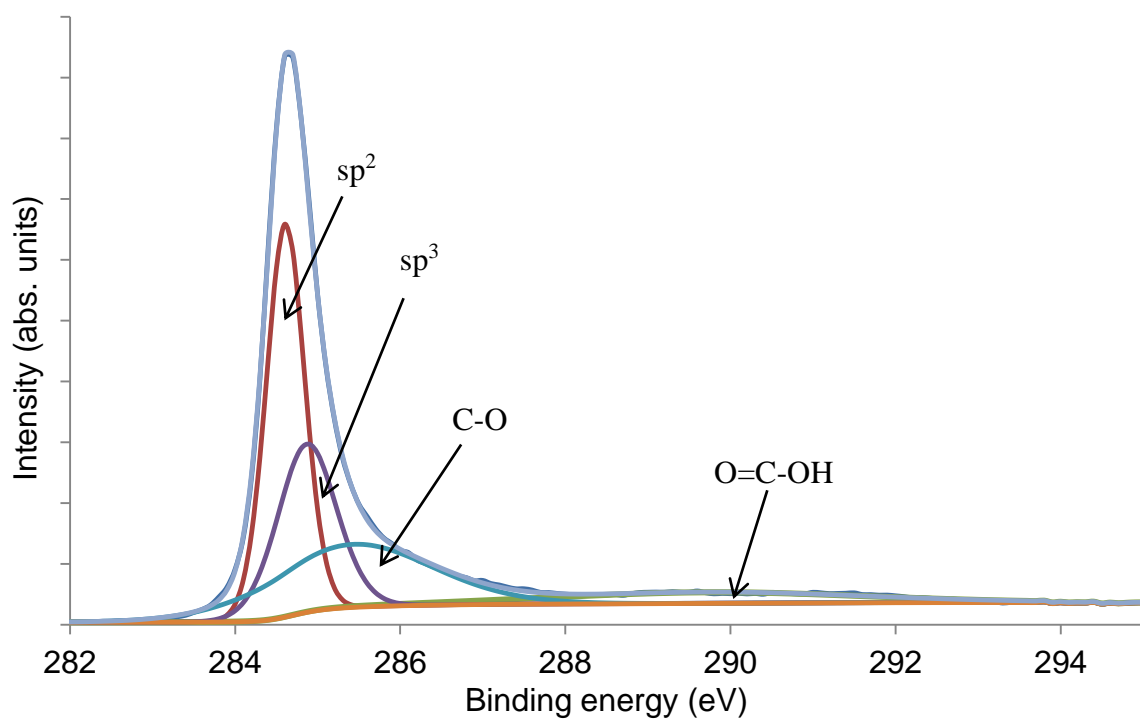

**Figure S1:** Core level XPS spectra of C 1s peak of MWCNTs.

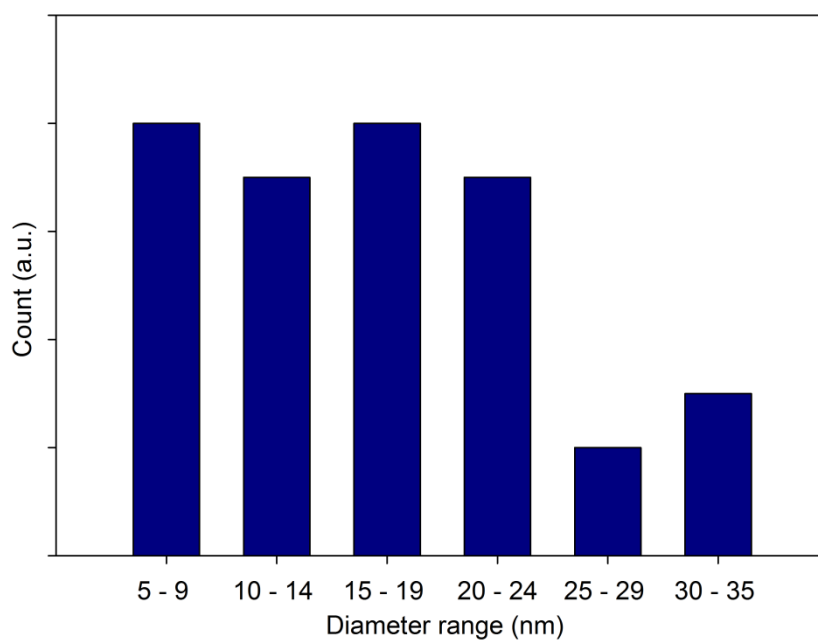

**Figure S2:** Particle size distribution of MnFe<sub>2</sub>O<sub>4</sub> nanoparticles.
